# Supplementary material
Source: Springer Nature journal article supplement (https://www.springermedizin.de/resource/supplementary/12943_2009_532_MOESM6_ESM.pdf/9554576)

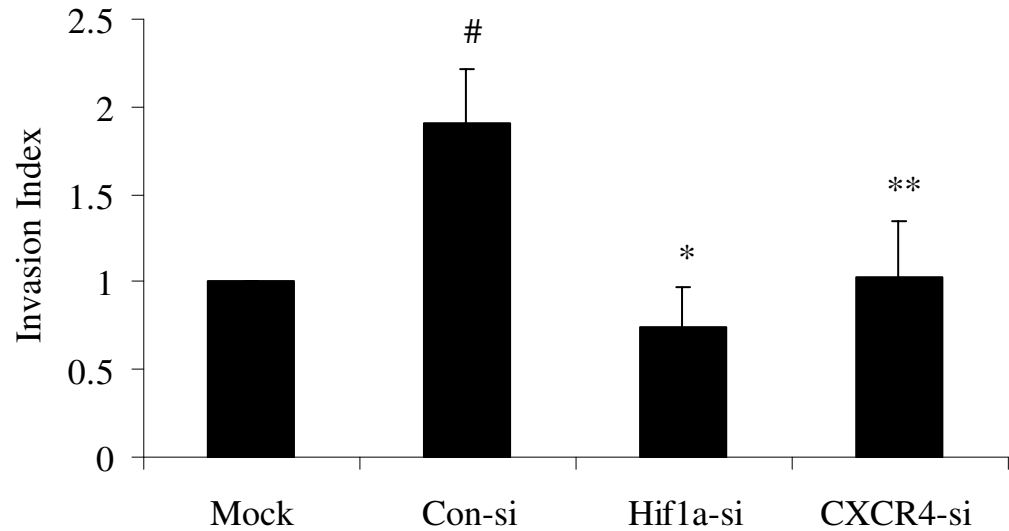

SIRNA

-

Control

Hif1a

CXCR4

SDF-1

-

+

+

+

Supplement: MOESM6 [file 9554576]
